# Supplementary material for: Self-templated formation of hierarchically yolk–shell-structured ZnS/NC dodecahedra with superior lithium storage properties
Source: Royal Society of Chemistry journal article supplement (doi:10.1039/d0nr07450k), 2020-12-23
Supplement: d0nr07450k1.pdf [file d0nr07450k1.pdf]

## Supporting Information

### Self-templated formation of hierarchically yolk-shell-structured ZnS/NC dodecahedra with superior lithium storage properties

Ping Wang <sup>a,b</sup>, Aihua Yuan <sup>\*a,c</sup>, Zhitao Wang <sup>c</sup>, Xiaoping Shen <sup>d</sup>, Hantao Chen <sup>c</sup>, Hu Zhou <sup>\*a</sup>

<sup>a</sup> School of Materials Science and Engineering, Jiangsu University of Science and Technology, Zhenjiang 212003, PR China.

<sup>b</sup> School of Chemical & Materials Engineering, Zhenjiang College, Zhenjiang 212000, PR China.

<sup>c</sup> School of Environmental and Chemical Engineering, Jiangsu University of Science and Technology, Zhenjiang 212003, PR China.

<sup>d</sup> School of Chemistry and Chemical Engineering, Jiangsu University, Zhenjiang 212013, PR China.

\*Corresponding author E-mail: *aihua.yuan@just.edu.cn* (A. H. Yuan), *zhmiao119@sina.com* (H. Zhou).

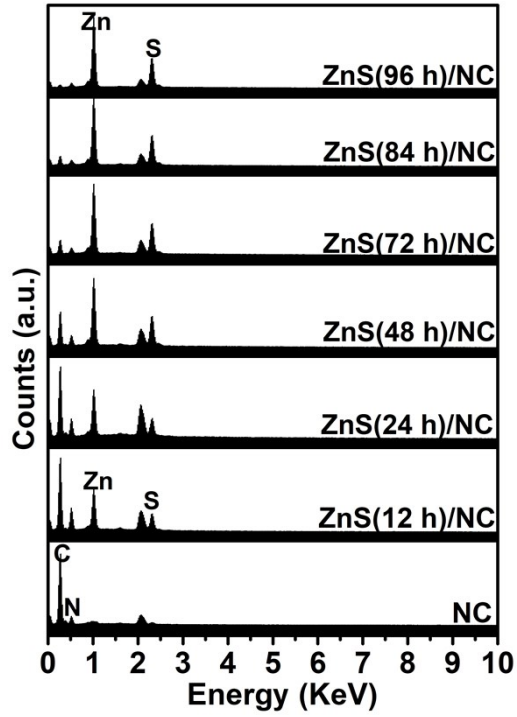

Fig. S1 EDS results of ZnS(x h)/NC.

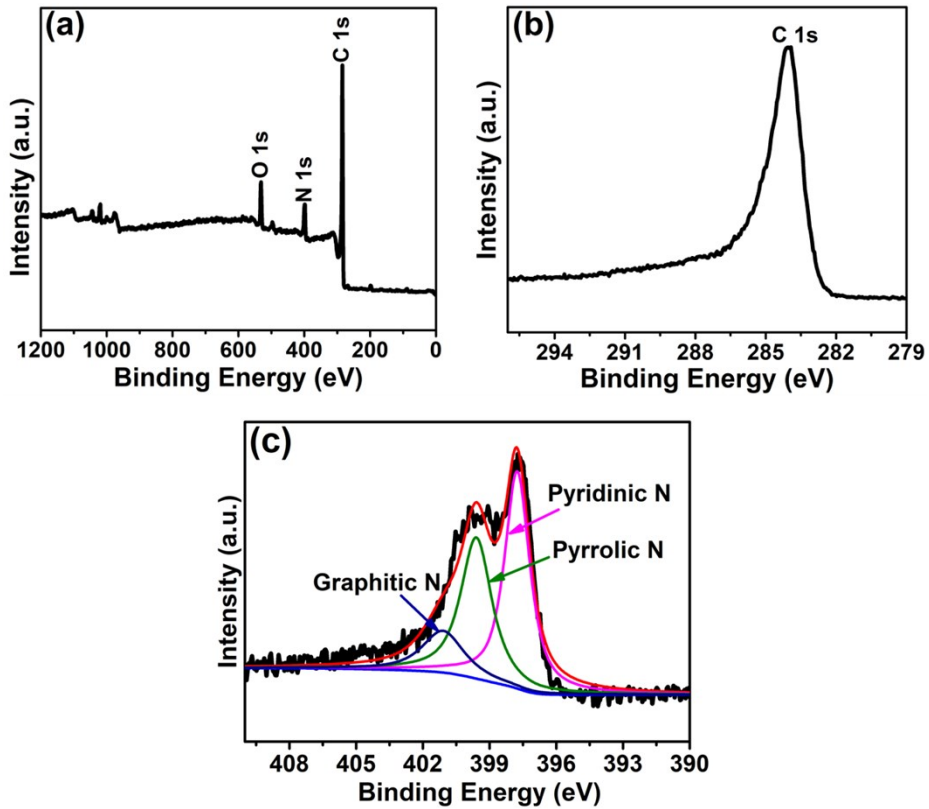

Fig. S2 XPS spectra of NC: (a) survey, (b) C1s, and (c) N1s.

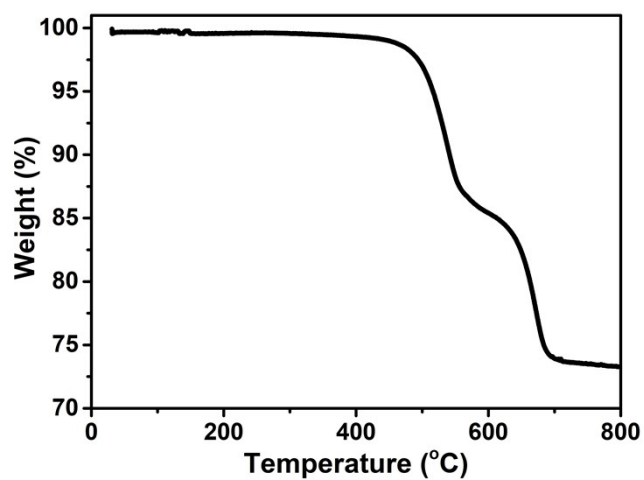

**Fig. S3** TG curve of ZnS(72 h)/NC.

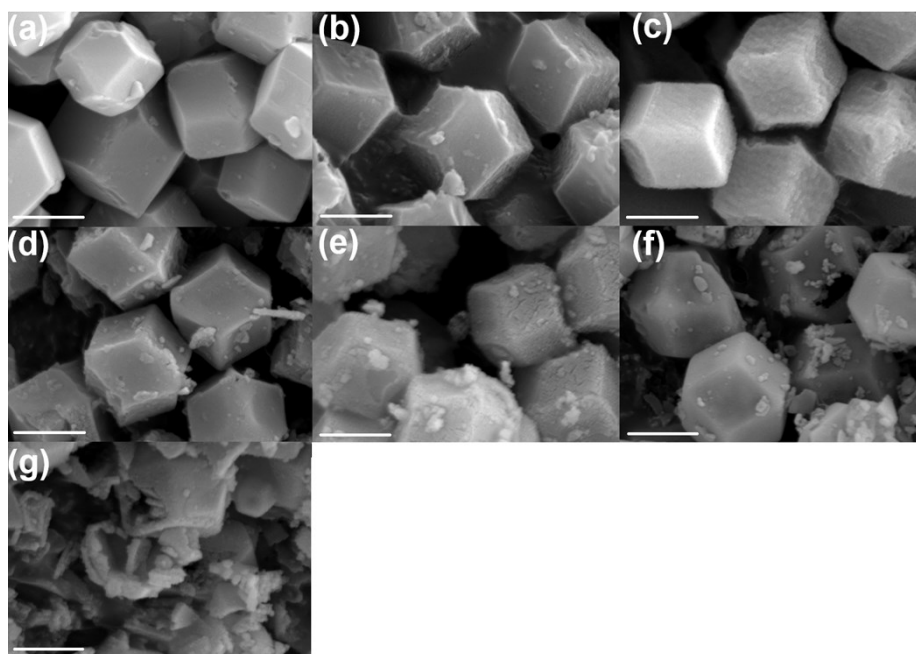

**Fig. S4** SEM images of (a) ZIF-8, (b) ZnS(12 h)@ZIF-8, (c) ZnS(24 h)@ZIF-8, (d) ZnS(48 h)@ZIF-8, (e) ZnS(72 h)@ZIF-8, (f) ZnS(84 h)@ZIF-8, and (g) ZnS(96 h)@ZIF-8. The scale bar represents 1 μm.

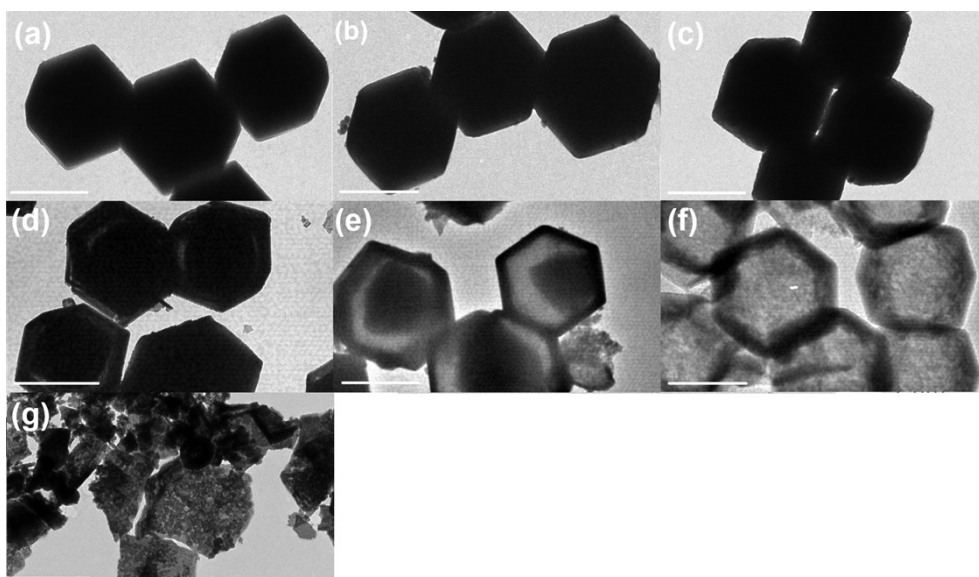

**Fig. S5** TEM images of (a) ZIF-8, (b) ZnS(12 h)@ZIF-8, (c) ZnS(24 h)@ZIF-8, (d) ZnS(48 h)@ZIF-8, (e) ZnS(72 h)@ZIF-8, (f) ZnS(84 h)@ZIF-8, and (g) ZnS(96 h)@ZIF-8. The scale bar represents 1  $\mu\text{m}$ .

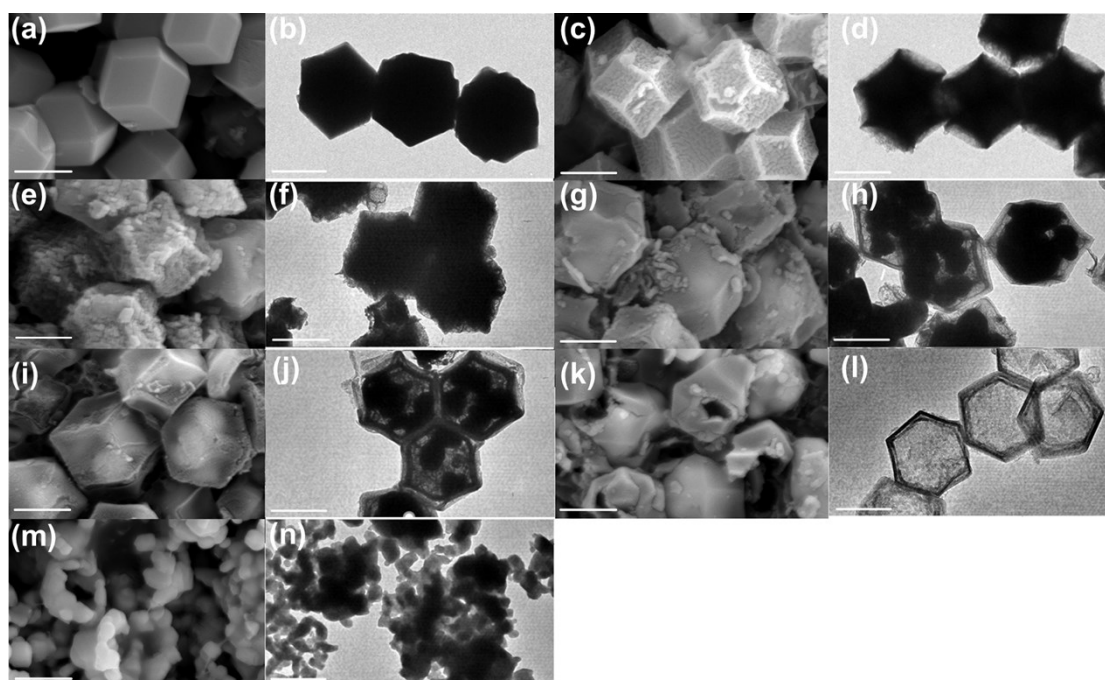

**Fig. S6** SEM and TEM images of (a, b) NC, (c, d) ZnS(12 h)/NC, (e, f) ZnS(24 h)/NC, (g, h) ZnS(48 h)/NC, (i, j) ZnS(72 h)/NC, (k, l) ZnS(84 h)/NC, and (m, n) ZnS(96 h)/NC. The scale bar represents 1  $\mu\text{m}$ .

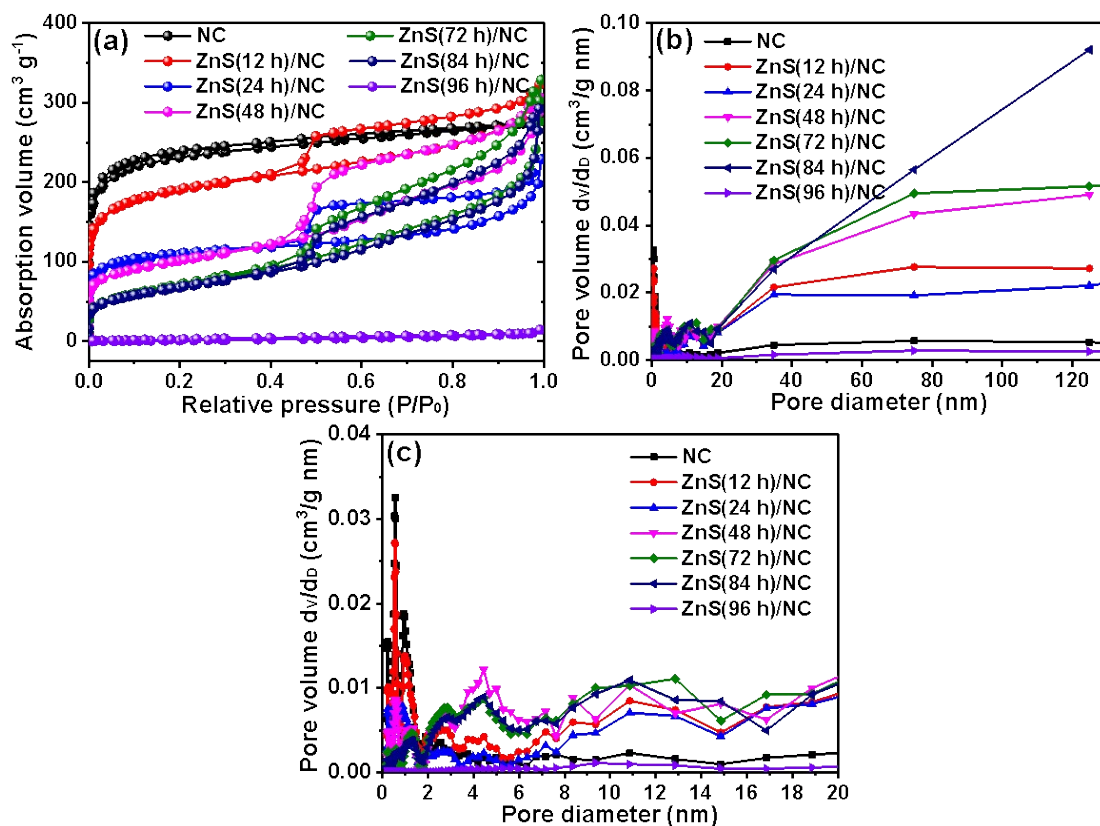

**Fig. S7** (a)  $N_2$  adsorption-desorption isotherms (77 K) and (b, c) pore size distributions of NC and  $ZnS(x\text{ h})/NC$  ( $x = 12\sim 96$ ).

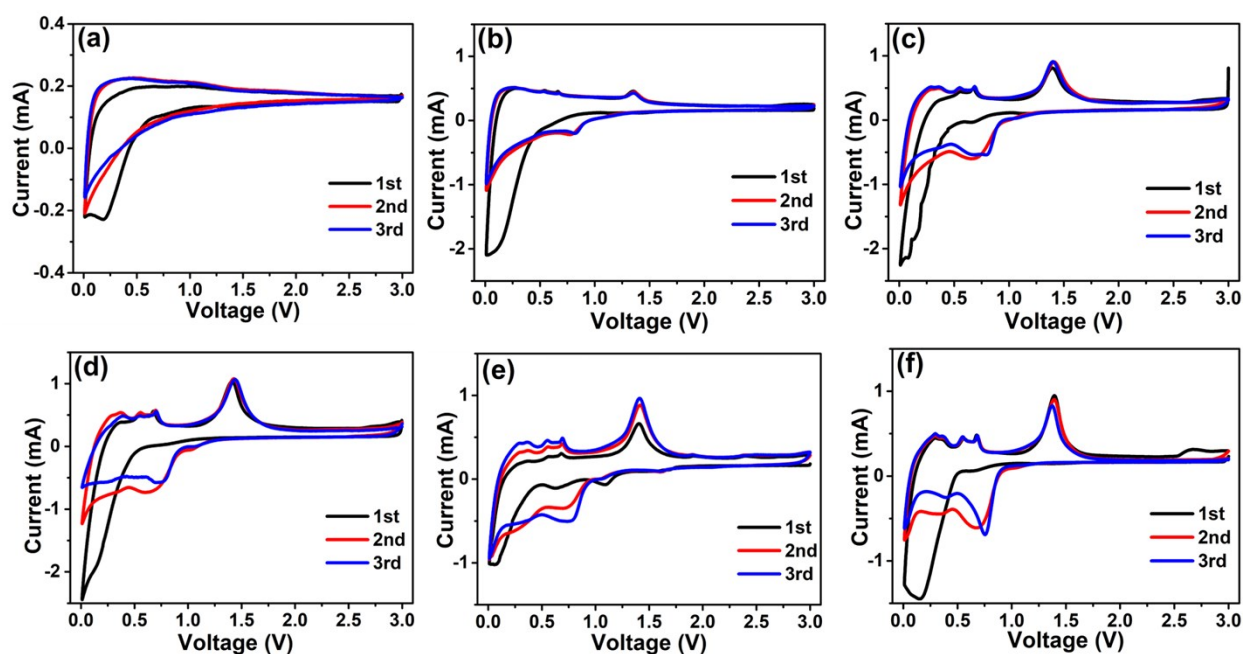

**Fig. S8** Cyclic voltammetry curves of (a) NC, (b)  $ZnS(12\text{ h})/NC$ , (c)  $ZnS(24\text{ h})/NC$ , (d)  $ZnS(48\text{ h})/NC$ , (e)  $ZnS(84\text{ h})/NC$ , and (f)  $ZnS(96\text{ h})/NC$ .

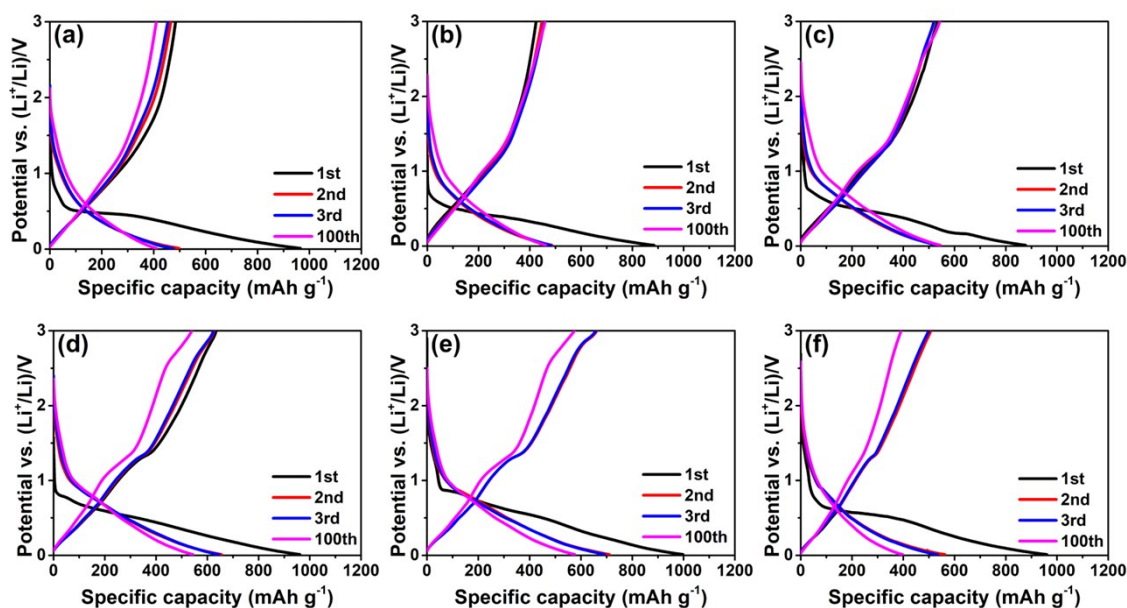

**Fig. S9** Galvanostatic discharge-charge voltage profiles at  $100 \text{ mA g}^{-1}$  of (a) NC, (b) ZnS(12 h)/NC, (c) ZnS(24 h)/NC, (d) ZnS(48 h)/NC, (e) ZnS(84 h)/NC, and (f) ZnS(96 h)/NC.

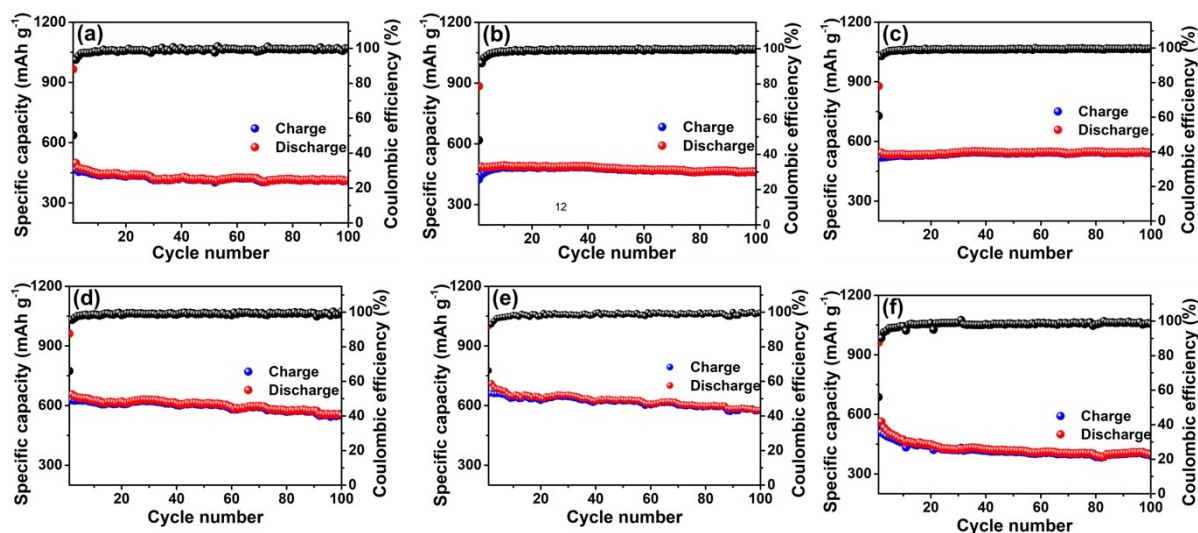

**Fig. S10** Cycling performance and coulombic efficiency in the voltage window of  $0.01 \sim 3.0 \text{ V}$  vs.  $\text{Li}/\text{Li}^+$  at  $200 \text{ mA g}^{-1}$  of (a) NC, (b) ZnS(12 h)/NC, (c) ZnS(24 h)/NC, (d) ZnS(48 h)/NC, (e) ZnS(84 h)/NC, and (f) ZnS(96 h)/NC.

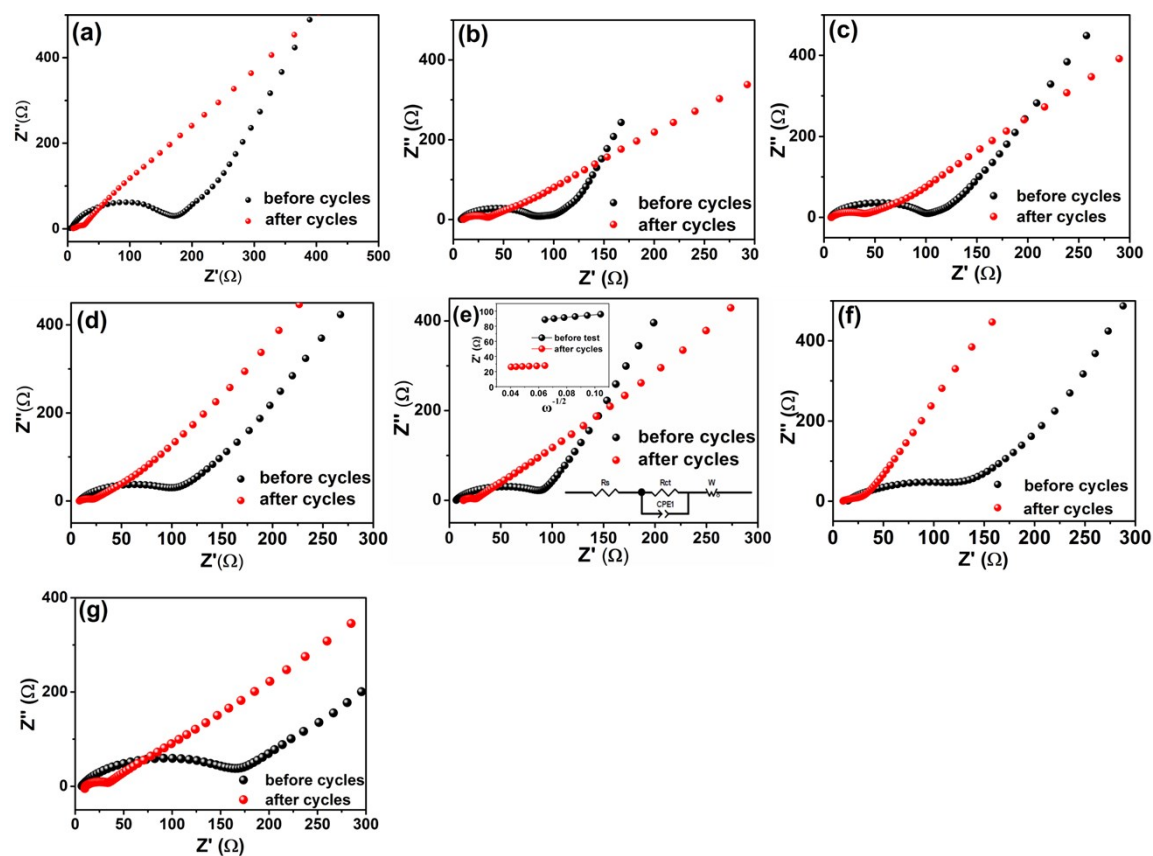

**Fig. S11** Impedance spectrum as-prepared sample. (a) NC, (b) ZnS(12 h)/NC, (c) ZnS(24 h)/NC, (d) ZnS(48 h)/NC, (e) ZnS(72 h)/NC (inset: the plot of  $Z_{re}$  vs. the reciprocal root square of the low angular frequencies ( $\omega^{-1/2}$ )), (f) ZnS(84 h)/NC, (g) ZnS(96 h)/NC.

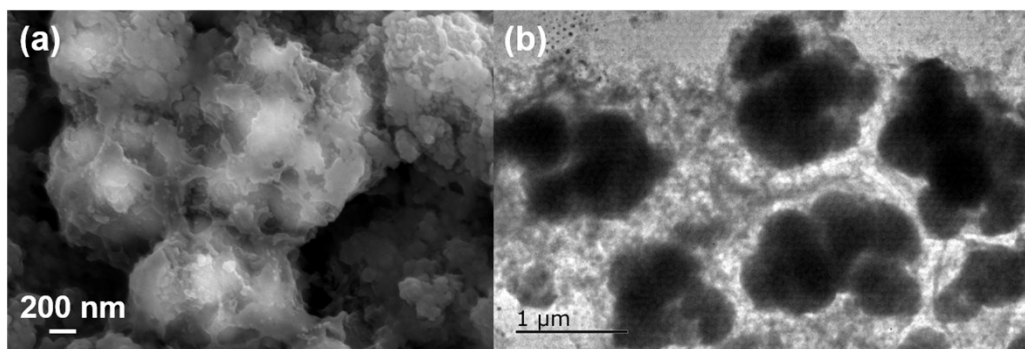

**Fig. S12** (a) SEM and (b) TEM images of the ZnS(72 h)/NC electrode after the cycles.

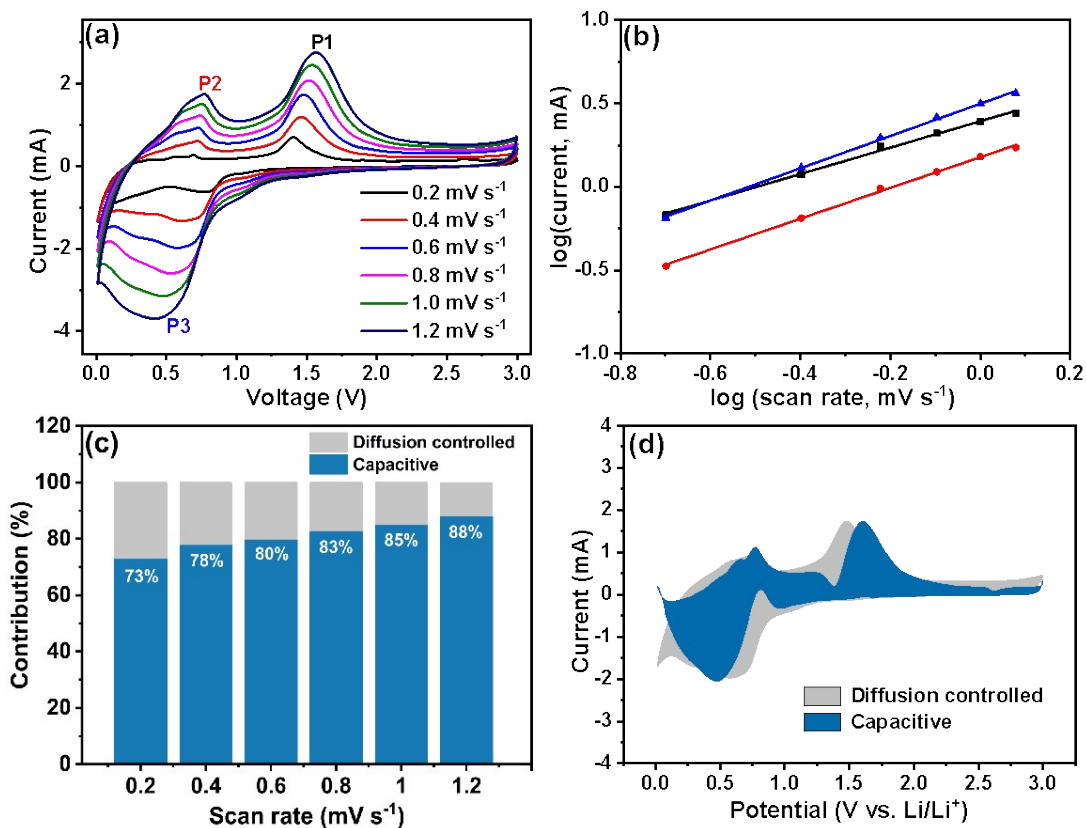

**Fig. S13** (a) CV curves of ZnS(72 h)/NC at different scan rates; (b) Determination of the  $b$ -value by plotting the linear relationship between  $\log(i)$  and  $\log(v)$ ; (c) Charge contribution ratios from capacitive and diffusion-controlled process at various scan rates; (d) Separation of the capacitive and diffusion-controlled currents at a scan rate of 0.6  $\text{mV s}^{-1}$ .



**Table S1** Electrochemical performances of ZnS-based anode materials for LIBs.

| Materials           | Specific capacity (mAh g <sup>-1</sup> ) | Cycle number | Current density (mA g <sup>-1</sup> ) | Reference        |
|---------------------|------------------------------------------|--------------|---------------------------------------|------------------|
| <b>ZnS(72 h)/NC</b> | <b>757</b>                               | <b>200</b>   | <b>200</b>                            | <b>this work</b> |
|                     | <b>~500</b>                              | <b>1000</b>  | <b>2000</b>                           |                  |
| ZnS-C/graphene      | 571                                      | 120          | 1000                                  | S1               |
| ZnS/graphene        | 570                                      | 200          | 200                                   | S2               |
| ZnS-rGO             | 776                                      | 100          | 100                                   | S3               |
| ZnS@NC              | 690                                      | 100          | 100                                   | S4               |
| ZnS/NPC             | 1067                                     | 200          | 100                                   | S5               |
| ZnS NR@HCP          | 840                                      | 300          | 600                                   | S6               |
| ZnS/C NPs           | 506                                      | 600          | 500                                   | S7               |
| ZnS-QDS@NC          | 506                                      | 300          | 840                                   | S8               |
| ZnS-C               | 530                                      | 600          | 100                                   | S9               |
| ZnS/C               | 570                                      | 150          | 100                                   | S10              |
| ZnS/C               | 741                                      | 300          | 100                                   | S11              |
| ZnS-C               | 868                                      | 300          | 1000                                  | S12              |
| ZnS/C               | 482                                      | 300          | 400                                   | S13              |
| ZnS/nano-cell       | 1134                                     | 100          | 500                                   | S14              |
| Zn-Co-S@N-C         | 668                                      | 300          | 1000                                  | S15              |

**Table S2** Electrochemical impedance fitting parameters of ZnS(72 h)/NC.

| Cycles       | $R_s$ ( $\Omega$ ) | $R_{ct}$ ( $\Omega$ ) | $\sigma$ ( $\Omega$ S <sup>-1/2</sup> ) | $D_{Li^+}$ (cm <sup>2</sup> s <sup>-1</sup> ) |
|--------------|--------------------|-----------------------|-----------------------------------------|-----------------------------------------------|
| before test  | 7                  | 93                    | 179                                     | $9.86 \times 10^{-13}$                        |
| after cycles | 13                 | 15                    | 73                                      | $5.9 \times 10^{-12}$                         |

The diffusion coefficients ( $D$ ) of Li<sup>+</sup> ions can be calculated from the following formula of  $D = R^2 T^2 / (2A^2 n^4 F^4 C^2 \sigma^2)$  where  $A$  is the surface area of electrode,  $n$  is the number of electrons per molecule attending electronic transfer reaction,  $F$  is the Faraday constant,  $C$  is the concentration of Li<sup>+</sup> in the electrode,  $\sigma$  is the slope of the line  $Z' \sim \omega^{-1/2}$ ,  $R$  is the gas constant, and  $T$  is ambient temperature. The  $F$  and  $R$  values are 96500 C mol<sup>-1</sup> and 8.314 J K<sup>-1</sup> mol<sup>-1</sup>, respectively.

## References

- 1 G. Y. Tian, Z. J. Zhao, A. Sarapulova, C. Das, L. H. Zhu, S. Y. Liu, A. Missiul, E. Welter, J. Maibach and S. Dsoke, *J. Mater. Chem. A*, 2019, **7**, 15640-15653.
- 2 M. L. Mao, L. Jiang, L. C. Wu, M. Zhang and T. H. Wang, *J. Mater. Chem. A*, 2015, **3**, 13384-13389.
- 3 Y. Feng, Y. L. Zhang, Y. Z. Wei, X. Y. Song, Y. B. Fu and V. S. Battaglia, *Phys. Chem. Chem. Phys.*, 2016, **18**, 30630-30642.
- 4 J. M. Li, Y. Fu, X. D. Shi, Z. M. Xu and Z. A. Zhang, *Chem. Eur. J.*, 2017, **23**, 157-166.
- 5 J. B. Li, D. Yan, X. J. Zhang, S. J. Hou, T. Lu, Y. F. Yao and L. K. Pan, *J. Mater. Chem. A*, 2017, **5**, 20428-20438.
- 6 Z. L. Chen, R. B. Wu, H. Wang, Y. K. Jiang, L. Jin, Y. H. Guo, Y. Song, F. Fang and D. L. Sun, *Chem. Eng. J.*, 2017, **326**, 680-690.
- 7 X. F. Du, H. L. Zhao, Z. J. Zhang, Y. Lu, C. H. Gao, Z. L. Li, Y. Q. Teng, L. N. Zhao and K. Świerczek, *Electrochim. Acta*, 2017, **225**, 129-136.
- 8 D. L. Fang, S. M. Chen, X. Wang, Y. Bando, D. Golberg and S. J. Zhang, *J. Mater. Chem. A*, 2018, **6**, 8358-8365.
- 9 A. K. Kole, C. S. Tiwary and P. Kumbhakar, *J. Mater. Chem. C*, 2014, **2**, 4338-4346.
- 10 A. R. Park, K. J. Jeon and C. M. Park, *Electrochim. Acta*, 2018, **265**, 107-114.
- 11 X. F. Du, H. L. Zhao, Y. Lu, Z. J. Zhang, A. Kulka and K. Świerczek, *Electrochim. Acta*, 2017, **228**, 100-106.
- 12 Y. S. Jang and Y. C. Kang, *Phys. Chem. Chem. Phys.*, 2013, **15**, 16437-16441.
- 13 L. He, X. Z. Liao, K. Yang, Y. S. He, W. Wen and Z. F. Ma, *Electrochim. Acta*, 2011, **56**, 1213-1218.
- 14 H. W. Du, X. C. Gui, R. L. Yang, H. Zhang, Z. Q. Lin, B. H. Liang, W. J. Chen, H. Zhu and J. Chen, *J. Mater. Sci.*, 2018, **53**, 14619-14628.
- 15 X. J. Wei, Y. B. Zhang, B. K. Zhang, Z. Lin, X. P. Wang, P. Hu, S. L. Li, X. Xin, X. Y. Cai, W. Yang and L. Q. Mai, *Nano Energy*, 2019, **64**, 103899.
